# Supplementary material
Source: PubMed Central journal article supplement (PMC6125968)
Supplement: JCB682509_supplementary_material.pdf [file JCB682509_supplementary_material.pdf]

## **ONLINE SUPPLEMENT**

**Hemodynamic mechanisms underlying elevated oxygen extraction fraction (OEF) in moyamoya and sickle cell anemia patients**

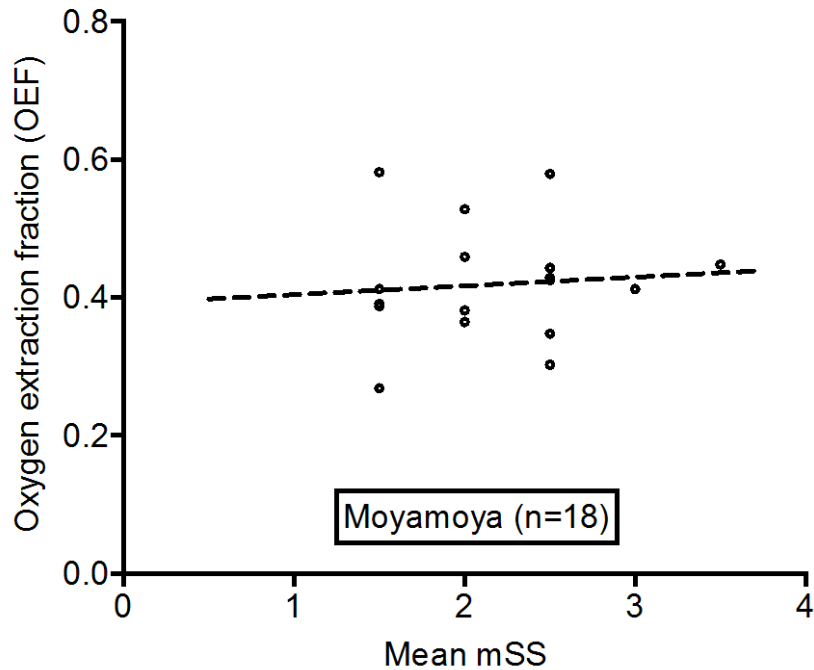

**Supplemental Figure I.** OEF measurements as a function of mean modified Suzuki score (mSS; mean of right and left hemisphere). No significant relationship was observed between mean mSS and whole-brain OEF.

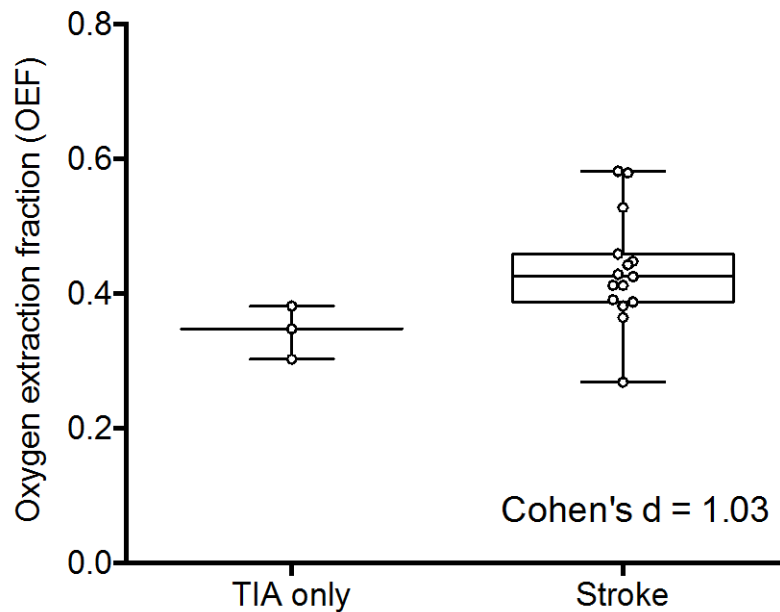

**Supplemental Figure II.** OEF measurements in patients with transient ischemic attack (TIA) only (n=3) compared to patients with imaging findings consistent with infarct on FLAIR imaging > 3mm. In the current sample, patients with overt stroke relative to TIA had a higher OEF, however additional studies with more patients are required to understand the relationship between OEF and stroke risk in this population.

| Group                | n  | PLD (seconds) | Tau (seconds) | PLD + Tau (seconds) |
|----------------------|----|---------------|---------------|---------------------|
| <b>SCA arm</b>       |    |               |               |                     |
| Controls             | 11 | 1.9           | 1             | 2.9                 |
| SCA patients         | 18 | 1.9           | 1             | 2.9                 |
| <b>Moyamoya arm</b>  |    |               |               |                     |
| Control group 1      | 2  | 1.7           | 1.5           | 3.2                 |
| Control group 2      | 3  | 1.9           | 1.5           | 3.5                 |
| Control group 3      | 9  | 1.8           | 1.65          | 3.45                |
| Control group 4      | 11 | 1.9           | 1             | 2.9                 |
| Control group 5      | 18 | 1.525         | 1.65          | 3.175               |
| Moyamoya patients I  | 10 | 1.525         | 1.65          | 3.175               |
| Moyamoya patients II | 8  | 1.8           | 1.65          | 3.45                |

**Supplemental Table I.** Pseudo-continuous arterial spin labeling (pCASL) parameters used for the SCA and moyamoya arm of the study.

| Measurements (mean values)             | Moyamoya Arm    |                 | Sickle cell anemia arm |            |
|----------------------------------------|-----------------|-----------------|------------------------|------------|
|                                        | Controls (n=43) | Moyamoya (n=18) | Controls (n=11)        | SCA (n=18) |
| $R_2$ (1/s)                            | 15.14           | 18.39           | 15.52                  | 13.09      |
| 90% confidence interval of $R_2$ (1/s) | 2.65            | 2.93            | 2.40                   | 1.48       |
| Standard error of $R_2$ (1/s)          | 0.68            | 0.88            | 0.61                   | 0.38       |
| Venous oxygen saturation ( $Y_v$ ) (%) | 63.7            | 56.3            | 62.4                   | 56.5       |
| Standard error of $Y_v$ (%)            | 1.62            | 1.50            | 1.41                   | 0.83       |

**Supplemental Table II.** Mean values of venous blood water  $R_2=1/T_2$ , 90% confidence intervals of  $R_2$ , standard error of  $R_2$ , venous oxygenation, and standard error of venous oxygenation for each participant group. Neither the confidence intervals nor standard errors varied between groups.
